# Supplementary material for: Hohenheimer Inventar zum Politikwissen (HIP)
Source: Atypon-hosted journal article supplement (doi:10.1026/0012-1924/a000180), 2017-03-10
Supplement: 0012-1924_a000180_esm1.pdf [file 0012-1924_a000180_esm1.pdf]

ESM I. Hohenheimer Inventar zum Politikwissen (HIP)

Zusatzmaterialien zu Trepte, S., Loy, L. S., Schmitt, J. B., & Otto, S. Hohenheimer Inventar zum Politikwissen (HIP): Konstruktion und Skalierung.  
*Diagnostica*

**Dimension 1: Grundlagenwissen**

| Subdimension             | Facette      | Fragen                                                             | Antworten <sup>1</sup>                                                                                                                                                                                                                                                                                                               | $\delta^2$ | Infit <sup>3</sup> |
|--------------------------|--------------|--------------------------------------------------------------------|--------------------------------------------------------------------------------------------------------------------------------------------------------------------------------------------------------------------------------------------------------------------------------------------------------------------------------------|------------|--------------------|
| 1. Staatliche Strukturen | Föderalismus | 1. Wie viele Bundesländer hat die Bundesrepublik Deutschland?      | a) <b>16</b><br>b) 15<br>c) 14<br>d) 17                                                                                                                                                                                                                                                                                              | -1.537     | 1.04               |
|                          |              | 2. Welches ist das bevölkerungsreichste Bundesland in Deutschland? | a) <b>Nordrhein-Westfalen</b><br>b) Bayern<br>c) Baden-Württemberg<br>d) Niedersachsen                                                                                                                                                                                                                                               | -0.541     | 0.96               |
|                          |              | 3. Was wird als „Subsidiaritätsprinzip“ bezeichnet?                | a) <b>Entscheidungen sollen auf der niedrigstmöglichen Ebene getroffen werden.</b><br>b) Entscheidungen sollen auf der höchstmöglichen Ebene getroffen werden.<br>c) Die Bundesländer haben in gewissen Bereichen alleinige Entscheidungsmacht.<br>d) Die Bundesländer müssen mehr entmachteter werden.                              | 0.966      | 1.11               |
|                          |              | 4. Was verbirgt sich hinter dem Begriff "Länderfinanzausgleich"?   | a) <b>Die Umverteilung finanzieller Mittel zwischen den deutschen Bundesländern</b><br>b) Eine finanzielle Unterstützung der neuen deutschen Bundesländer nach der Wiedervereinigung<br>c) Eine Maßnahme für die finanzielle Stabilität in der Europäischen Union<br>d) Eine finanzielle Wiedergutmachungsleistung für Kriegsschäden | -0.496     | 0.86               |
|                          |              | 5. Welche Funktion hat der Föderalismus in Deutschland?            | a) Gewaltenteilung zwischen den politischen Ebenen des Bundes und der Länder<br>b) Kontrolle der Bundespolitik durch die Regierungen der Bundesländer<br>c) Gleichberechtigung der Bundesländer<br>d) <b>Alle Antworten sind zutreffend.</b>                                                                                         | 0.712      | 1.15               |

| Subdimension | Facette    | Fragen                                                                                          | Antworten <sup>1</sup>                                                                                                                                                                                                                                                                             | $\delta^2$ | Infit <sup>3</sup> |
|--------------|------------|-------------------------------------------------------------------------------------------------|----------------------------------------------------------------------------------------------------------------------------------------------------------------------------------------------------------------------------------------------------------------------------------------------------|------------|--------------------|
|              | Verfassung | 6. Wer gibt laut Artikel 65 des Grundgesetzes in Deutschland die "Richtlinien der Politik" vor? | a) <b>Bundeskanzler/in</b><br>b) Bundesverfassungsgericht<br>c) Bundesrat<br>d) Wahlberechtigte Bürger/innen                                                                                                                                                                                       | 1.343      | 0.95               |
|              |            | 7. Wer darf in Deutschland eine Verfassungsbeschwerde beim Bundesverfassungsgericht einlegen?   | a) <b>Jede/r deutsche Bürger/in</b><br>b) Nur Regierungsvertreter/innen<br>c) Nur der/die Bundespräsident/in<br>d) Nur der Bundesrat                                                                                                                                                               | -1.190     | 0.95               |
|              |            | 8. Um das Grundgesetz zu ändern bedarf es welcher Mehrheit im Bundestag und Bundesrat?          | a) <b>Zwei-Drittel-Mehrheit</b><br>b) Absolute Mehrheit<br>c) Einfache Mehrheit<br>d) Drei-Viertel-Mehrheit                                                                                                                                                                                        | 0.243      | 1.04               |
|              |            | 9. Wer ist im Verteidigungsfall Oberbefehlshaber/in der Bundeswehr?                             | a) <b>Bundeskanzler/in</b><br>b) Bundespräsident/in<br>c) Bundesminister/in der Verteidigung<br>d) Generalinspekteur/in der Bundeswehr                                                                                                                                                             | 0.915      | 0.99               |
|              |            | 10. Wer ist in der Bundesrepublik Deutschland Teil der exekutiven (d. h. ausführenden) Gewalt?  | a) Die Bundesregierung<br>b) Die Polizei<br>c) Das Finanzamt<br>d) <b>Alle Antworten sind zutreffend.</b>                                                                                                                                                                                          | 2.117      | 1.13               |
|              | Wahlsystem | 11. Welche Funktion hat die Zweitstimme bei der Bundestagswahl?                                 | a) <b>Sie ist maßgeblich für die Sitzverteilung an die Parteien im Bundestag.</b><br>b) Mit ihr wählt man den/die Bürgermeister/in seiner Stadt.<br>c) Mit ihr wählt man den/die Bundespräsidenten/in.<br>d) Die Zweitstimme beeinflusst über die Überhangmandate die Sitzverteilung im Bundestag. | 0.239      | 1.06               |
|              |            | 12. Von wem geht die Staatsgewalt in Deutschland aus?                                           | a) <b>Volk</b><br>b) Bundespräsident/in<br>c) Bundeskanzler/in<br>d) Bundeswehr                                                                                                                                                                                                                    | 0.138      | 0.94               |

| Subdimension | Facette            | Fragen                                                                                    | Antworten <sup>1</sup>                                                                                                                                                                                                              | $\delta^2$                                                                                                                                                               | Infit <sup>3</sup> |      |
|--------------|--------------------|-------------------------------------------------------------------------------------------|-------------------------------------------------------------------------------------------------------------------------------------------------------------------------------------------------------------------------------------|--------------------------------------------------------------------------------------------------------------------------------------------------------------------------|--------------------|------|
|              |                    | 13. Wer kann an der Wahl des Bundespräsidenten/der Bundespräsidentin teilnehmen?          | a) <b>Mitglieder der Bundesversammlung</b><br>b) Mitglieder des Bundestags<br>c) Wahlberechtigte Bürger/innen Deutschlands<br>d) Mitglieder des Bundesrats                                                                          | 1.037                                                                                                                                                                    | 0.89               |      |
|              |                    | 14. Nach welchem Wahlsystem wird der Bundestag in der Bundesrepublik Deutschland gewählt? | a) <b>Personalisiertes Verhältniswahlrecht</b><br>b) Aristokratenwahlrecht<br>c) Absolutes Mehrheitswahlrecht<br>d) Anonymisiertes Gruppenwahlrecht                                                                                 | 1.028                                                                                                                                                                    | 1.01               |      |
|              |                    | 15. Wer darf in Deutschland bei der Bundestagswahl <u>nicht</u> wählen?                   | a) <b>Deutsche Staatsbürger/innen unter 18 Jahren</b><br>b) Deutsche Staatsbürger/innen, die im Ausland leben<br>c) Personen, die die deutsche Staatsbürgerschaft weniger als 1 Jahr besitzen<br>d) Alle Antworten sind zutreffend. | -0.649                                                                                                                                                                   | 1.07               |      |
|              | Internationales EU |                                                                                           | 16. Für welche Politik ist ausschließlich die Europäische Union zuständig?                                                                                                                                                          | a) <b>Währungspolitik</b><br>b) Infrastrukturpolitik<br>c) Sicherheits- und Verteidigungspolitik<br>d) Asylpolitik                                                       | -0.308             | 1.00 |
|              |                    |                                                                                           | 17. Welches Gremium der EU besteht aus jeweils einem Minister bzw. einer Ministerin der Mitgliedsstaaten?                                                                                                                           | a) <b>Rat der Europäischen Union</b><br>b) Europäische Zentralbank<br>c) Europaparlament<br>d) Europäische Kommission                                                    | 1.174              | 1.09 |
|              |                    |                                                                                           | 18. Was wurde mit dem Maastricht-Vertrag beschlossen?                                                                                                                                                                               | a) <b>Die Bildung der Europäischen Union</b><br>b) Das Ende des zweiten Weltkrieges<br>c) Die deutsch-niederländische Zusammenarbeit<br>d) Das Ende des römischen Reichs | -0.446             | 0.91 |
|              |                    |                                                                                           | 19. In welcher Stadt befindet sich der Hauptsitz der EU-Kommission?                                                                                                                                                                 | a) <b>Brüssel</b><br>b) Straßburg<br>c) Luxemburg<br>d) Antwerpen                                                                                                        | -1.322             | 1.06 |

| Subdimension          | Facette            | Fragen                                                                                                                                   | Antworten <sup>1</sup>                                                                                                                                                                                                            | $\delta^2$ | Infit <sup>3</sup> |
|-----------------------|--------------------|------------------------------------------------------------------------------------------------------------------------------------------|-----------------------------------------------------------------------------------------------------------------------------------------------------------------------------------------------------------------------------------|------------|--------------------|
|                       |                    | 20. Was verbirgt sich hinter dem Begriff "Frontex"?                                                                                      | <b>a) Europäische Grenzschutzagentur</b><br>b) Spezialeinsatzkommando des deutschen Zollkriminalamts<br>c) Europäisches Grenzüberwachungssystem<br>d) Bodentruppen der Bundeswehr bei Auslandseinsätzen                           | 1.457      | 1.05               |
|                       | Internationales UN | 21. Welche Kernverbrechen fallen in den Zuständigkeitsbereich des Internationalen Strafgerichtshofs?                                     | a) Völkermord und Verbrechen gegen die Menschlichkeit<br>b) Kriegsverbrechen<br>c) Verbrechen der Aggression<br><b>d) Alle Antworten sind zutreffend.</b>                                                                         | 0.819      | 1.17               |
|                       |                    | 22. Was gehört <u>nicht</u> zu den Aufgaben des Internationalen Währungsfonds?                                                           | <b>a) Gestaltung der Vorder- und Rückseiten von Geldmünzen</b><br>b) Stabilisierung von Wechselkursen<br>c) Ausweitung des Welthandels<br>d) Förderung der internationalen Zusammenarbeit in der Währungspolitik                  | 0.133      | 1.09               |
|                       |                    | 23. Durch wen wird der Präsident der Vereinigten Staaten von Amerika gewählt?                                                            | <b>a) Durch die Wahlmänner</b><br>b) Durch den Senat<br>c) Durch die Gouverneure<br>d) Durch das Volk direkt                                                                                                                      | 0.357      | 0.87               |
|                       |                    | 24. Welches Land ist kein ständiges Mitglied im UN-Sicherheitsrat?                                                                       | <b>a) Deutschland</b><br>b) China<br>c) USA<br>d) Russland                                                                                                                                                                        | 0.81       | 0.84               |
|                       |                    | 25. Welche Institution der UN setzt die Einhaltung von Menschenrechten durch?                                                            | <b>a) Es gibt keine solche Institution.</b><br>b) Der Hochkommissar für Menschenrechte<br>c) Der Menschenrechtsrat<br>d) Amnesty International                                                                                    | 1.811      | 1.08               |
| 2. Historische Fakten | Deutschland        | 26. Nach dem zweiten Weltkrieg war Deutschland ein geteiltes Land und gab es zwei deutsche Staaten. Wie war ihre offizielle Bezeichnung? | <b>a) Bundesrepublik Deutschland und Deutsche Demokratische Republik</b><br>b) Ost- und Westdeutschland<br>c) Bundesdeutsche Demokratie und Deutsche kommunistische Republik<br>d) Ostdeutsche Republik und Westdeutsche Republik | -1.950     | 0.91               |

| Subdimension | Facette       | Fragen                                                                                     | Antworten <sup>1</sup>                                                                                                                                                                                                                                                                                                                       | $\delta^2$ | Infit <sup>3</sup> |
|--------------|---------------|--------------------------------------------------------------------------------------------|----------------------------------------------------------------------------------------------------------------------------------------------------------------------------------------------------------------------------------------------------------------------------------------------------------------------------------------------|------------|--------------------|
|              |               | 27. In welchem Jahr wurde Adolf Hitler als Reichskanzler vereidigt?                        | a) <b>1933</b><br>b) 1946<br>c) 1950<br>d) 1934                                                                                                                                                                                                                                                                                              | -0.663     | 0.99               |
|              |               | 28. Wofür steht der Begriff „Deutscher Herbst“?                                            | a) <b>Zeit und politische Atmosphäre im Jahr 1977, welche geprägt war durch Morde und Entführungen durch die RAF</b><br>b) Niedergang des deutschen Kaiserreiches<br>c) Im Herbst 1989 stattfindende Montagsdemonstrationen vor dem Fall der Berliner Mauer<br>d) Serie von Niederlagen der deutschen Truppen während des ersten Weltkrieges | 0.277      | 0.98               |
|              |               | 29. Was geschah am 3. Oktober 1990?                                                        | a) <b>Wiedervereinigung der beiden deutschen Staaten</b><br>b) Fall der Berliner Mauer<br>c) Rücktritt des DDR-Staatschefs Erich Honecker<br>d) Verhandlungsbeginn zum Beitritt der DDR                                                                                                                                                      | -0.948     | 1.00               |
|              |               | 30. Wie hieß Hitlers Minister für Propaganda?                                              | a) <b>Josef Goebbels</b><br>b) Albert Speer<br>c) Franz von Papen<br>d) Rudolf Hess                                                                                                                                                                                                                                                          | -1.689     | 0.90               |
|              | International | 31. Wie lauteten die Schlagworte der "Französischen Revolution"?                           | a) <b>Freiheit, Gleichheit, Brüderlichkeit</b><br>b) Einheit, Gleichheit, Bürgerlichkeit<br>c) Einigkeit, Mehrheit, Gerechtigkeit<br>d) Freiheit, Einheit, Gleichheit                                                                                                                                                                        | -0.875     | 0.96               |
|              |               | 32. Über welcher japanischen Stadt wurde am 6. August 1945 die erste Atombombe abgeworfen? | a) <b>Hiroshima</b><br>b) Nagasaki<br>c) Yokohama<br>d) Ōsaka                                                                                                                                                                                                                                                                                | -2.191     | 0.97               |
|              |               | 33. In welchem Jahr endete der 1. Weltkrieg?                                               | a) <b>1918</b><br>b) 1915<br>c) 1912<br>d) 1921                                                                                                                                                                                                                                                                                              | -1.110     | 0.95               |

| Subdimension | Facette | Fragen                                                                                          | Antworten <sup>1</sup>                                                                                                                                                                                                                                                                | $\delta^2$ | Infit <sup>3</sup> |
|--------------|---------|-------------------------------------------------------------------------------------------------|---------------------------------------------------------------------------------------------------------------------------------------------------------------------------------------------------------------------------------------------------------------------------------------|------------|--------------------|
|              |         | 34. Welche Staaten unterzeichneten den Vertrag, der die deutsche Wiedervereinigung ermöglichte? | <b>a) Bundesrepublik Deutschland, DDR, Frankreich, Großbritannien, Sowjetunion, USA</b><br>b) Bundesrepublik Deutschland, Deutsche Demokratische Republik<br>c) Bundesrepublik Deutschland, DDR, Frankreich, Italien, Japan, USA<br>d) Bundesrepublik Deutschland, DDR, USA, Russland | 0.193      | 1.02               |
|              |         | 35. In welches Land fand 2003 eine Invasion von amerikanischen und britischen Truppen statt?    | <b>a) Irak</b><br>b) Afghanistan<br>c) Syrien<br>d) Iran                                                                                                                                                                                                                              | 0.146      | 0.99               |

## Dimension 2: Aktuelles Wissen (Version November 2014)

| Subdimension       | Facette  | Fragen                                                                                                                                    | Antworten                                                                                                                                                                                                                                                                                                       | $\delta$ | Infit |
|--------------------|----------|-------------------------------------------------------------------------------------------------------------------------------------------|-----------------------------------------------------------------------------------------------------------------------------------------------------------------------------------------------------------------------------------------------------------------------------------------------------------------|----------|-------|
| 1. Aktuelle Themen | Außen    | 36. Der Gaza-Konflikt besteht hauptsächlich zwischen...                                                                                   | a) <b>...Israel und Palästina.</b><br>b) ...Syrien und Ägypten.<br>c) ...Jordanien und Palästina.<br>d) ...Israel und Syrien.                                                                                                                                                                                   | -0.964   | 0.88  |
|                    |          | 37. In welcher Region der Ukraine spielt sich der derzeitige Konflikt der Ukraine mit Russland im Wesentlichen ab?                        | a) <b>Ostukraine</b><br>b) Nordukraine<br>c) Südukraine<br>d) Westukraine                                                                                                                                                                                                                                       | -0.828   | 0.98  |
|                    |          | 38. Welcher Anteil der gehandelten Waren ist von den Regeln der Welthandelsorganisation (WTO) für grenzüberschreitenden Handel betroffen? | a) <b>Mehr als 90 Prozent</b><br>b) Weniger als 70 Prozent<br>c) Rund 30 Prozent<br>d) Etwa 60 Prozent                                                                                                                                                                                                          | 2.378    | 1.15  |
|                    | Inneres  | 39. Was bezeichnet der Begriff "Aufbau Ost"?                                                                                              | a) <b>Wirtschaftliche Förderung ostdeutscher Bundesländer</b><br>b) Umbau des Regierungsbezirks im ehemaligen Ostteil Berlins<br>c) Aufbau von Handelsbeziehungen zu osteuropäischen Nachbarstaaten<br>d) Errichtung eines Mahnmals zur Erinnerung an die DDR                                                   | -1.461   | 0.92  |
|                    |          | 40. Was bedeutet Datenschutz?                                                                                                             | a) <b>Verbot über das Speichern personenbezogener Informationen</b><br>b) Schutz von Straßennamen<br>c) Verbot der Änderung von Markennamen<br>d) Verbot über das Speichern von Verkehrsdaten                                                                                                                   | -2.594   | 0.94  |
|                    |          | 41. Zu welchen Parteien gehören die vier Fraktionen im Deutschen Bundestag?                                                               | a) <b>CDU/CSU, SPD, Bündnis 90/Die Grünen, Die Linke</b><br>b) CDU/CSU, FDP, SPD, Bündnis 90/Die Grünen<br>c) CDU/CSU, FDP, SPD, Die Linke<br>d) CDU/CSU, SPD, Bündnis 90/Die Grünen, AFD                                                                                                                       | -0.398   | 0.94  |
|                    | Finanzen | 42. Was ist die Aufgabe des Europäischen Stabilitätsmechanismus (ESM)?                                                                    | a) <b>Wahrung der Finanzstabilität des Euro-Währungsraums durch Vergabe von Notkrediten</b><br>b) Überwachung der Energieversorgungsstabilität in Europa<br>c) Kontrolle der Einwanderungszahlen im europäischen Raum<br>d) Wahrung der Export-/Importstabilität von Waren in den europäischen Mitgliedsstaaten | 0.162    | 0.93  |

| Subdimension | Facette             | Fragen                                                                                                                                                                                                                                                            | Antworten                                                                                                                                                                                         | $\delta$ | Infit |
|--------------|---------------------|-------------------------------------------------------------------------------------------------------------------------------------------------------------------------------------------------------------------------------------------------------------------|---------------------------------------------------------------------------------------------------------------------------------------------------------------------------------------------------|----------|-------|
|              |                     | 43. Wie hoch ist die Energiesteuer, die in Deutschland derzeit auf einen Liter Benzin Super erhoben wird?                                                                                                                                                         | a) <b>0,65 Euro</b><br>b) 1,23 Euro<br>c) 0,02 Euro<br>d) 0,27 Euro                                                                                                                               | 0.421    | 1.16  |
|              |                     | 44. Welches ist der wichtigste Finanzstandort in Deutschland?                                                                                                                                                                                                     | a) <b>Frankfurt</b><br>b) Düsseldorf<br>c) Berlin<br>d) Hamburg                                                                                                                                   | -1.755   | 0.88  |
|              | Arbeit und Soziales | 45. Welches Bundesministerium hatte im Haushaltsjahr 2013 die höchsten Ausgaben?                                                                                                                                                                                  | a) <b>Bundesministerium für Arbeit und Soziales</b><br>b) Bundesministerium für Verteidigung<br>c) Bundesministerium für Verkehr, Bau und Stadtentwicklung<br>d) Bundesministerium für Gesundheit | 0.701    | 1.01  |
|              |                     | 46. Wie hoch ist der allgemeine gesetzliche Mindestlohn in Deutschland?                                                                                                                                                                                           | a) <b>In Deutschland gibt es keinen allgemeinen gesetzlichen Mindestlohn.</b><br>b) 8,50 Euro pro Stunde<br>c) 10 Euro pro Stunde<br>d) 7,33 Euro pro Stunde                                      | 1.998    | 1.23  |
|              |                     | 47. Wie hoch ist die Höchstanspruchsdauer für Arbeitslosengeld I in Deutschland?                                                                                                                                                                                  | a) <b>24 Monate</b><br>b) 18 Monate<br>c) 36 Monate<br>d) 12 Monate                                                                                                                               | 1.738    | 1.24  |
|              | Verteidigung        | 48. Vor der Küste welchen Landes soll die "Operation-Atalanta" operierende Piraten abschrecken und bekämpfen, den zivilen Schiffsverkehr auf den dortigen Handelswegen sichern, Geiselnahmen und Lösegeldforderungen unterbinden und das Völkerrecht durchsetzen? | a) <b>Somalia</b><br>b) Kenia<br>c) Mosambik<br>d) Eritrea                                                                                                                                        | -0.939   | 0.93  |
|              |                     | 49. In welchem der folgenden Länder ist die Bundeswehr derzeit im Einsatz?                                                                                                                                                                                        | a) <b>Kongo</b><br>b) Syrien<br>c) Irak<br>d) Ägypten                                                                                                                                             | 2.126    | 0.95  |



| Subdimension | Facette | Fragen                                                                                                                                                                                                  | Antworten                                                                                                                                                                                                                                                                                                                                                                                                                                                                                                    | $\delta$ | Infit |
|--------------|---------|---------------------------------------------------------------------------------------------------------------------------------------------------------------------------------------------------------|--------------------------------------------------------------------------------------------------------------------------------------------------------------------------------------------------------------------------------------------------------------------------------------------------------------------------------------------------------------------------------------------------------------------------------------------------------------------------------------------------------------|----------|-------|
|              |         | 50. Unter welchen Umständen darf die Bundeswehr an Kampfhandlungen gegen die IS in Syrien teilnehmen?                                                                                                   | <b>a) Die Zustimmung des Parlaments ist notwendig</b><br>b) Der Befehl der Verteidigungsministerin ist ausreichend.<br>c) Die Zustimmung der Nato ist notwendig.<br>d) Der Befehl der Bundeskanzlerin ist ausreichend.                                                                                                                                                                                                                                                                                       | 0.346    | 1.00  |
|              | Familie | 51. Wen soll das Betreuungsgeld finanziell unterstützen?                                                                                                                                                | <b>a) Eltern, die ihr 2- bis 3-jähriges Kind zu Hause betreuen</b><br>b) Großeltern, die auf regelmäßiger Basis ihre Enkelkinder betreuen<br>c) Erzieher/innen, die in einem heilpädagogischen Kindergarten tätig sind<br>d) Eltern, die ihr 1-jähriges Kind zu Hause betreuen                                                                                                                                                                                                                               | 0.026    | 1.20  |
|              |         | 52. Welche der folgenden Aussagen trifft auf die "Elternzeit" zu?                                                                                                                                       | a) Es besteht gesetzlicher Anspruch auf Rückkehr zum Arbeitsplatz.<br>b) Um Anspruch auf Elternzeit zu haben, müssen Eltern mit ihrem Kind in einem Haushalt leben.<br>c) Männer dürfen Elternzeit nehmen.<br><b>d) Alle Antworten sind zutreffend.</b>                                                                                                                                                                                                                                                      | -0.357   | 1.11  |
|              |         | 53. Durch welche Maßnahmen plant das Bundesministerium für Familie, Senioren, Frauen und Jugend Frauen in Führungspositionen zu bringen?                                                                | <b>a) Börsennotierte Unternehmen sollen bis 2016 verpflichtet werden, eine Frauenquote von 30 Prozent für die Aufsichtsräte einzuführen.</b><br>b) Unternehmen sollen sich bis 2019 verpflichten, 30 Prozent ihrer Positionen mit Frauen zu besetzen.<br>c) Bestimmte Unternehmen mit frauentypischen Berufen sollen bis 2016 mindestens 30 Prozent der Führungspositionen mit Frauen besetzen.<br>d) Die deutschen Bundesministerien sollen ihre Ministerposten bis 2019 zu 30 Prozent mit Frauen besetzen. | 1.335    | 0.99  |
|              |         | 54. Für den Umweltschutz haben viele Staaten beschlossen, ihre Schadstoff-Emissionen zu verringern. Wie heißt die Vereinbarung, die festlegt, wieviel Schadstoff-Emissionen jedes Land herstellen darf? | <b>a) Kyoto-Protokoll</b><br>b) Tokyo-Beschluss<br>c) CO <sub>2</sub> -Stopp-Abkommen<br>d) Agenda-G13                                                                                                                                                                                                                                                                                                                                                                                                       | -0.071   | 0.82  |
|              | Umwelt  | 55. Was gilt als marktwirtschaftliches Instrument zur Durchsetzung von Umweltzielen durch die Politik?                                                                                                  | <b>a) Steuern</b><br>b) Sozialhilfen<br>c) Finanzausgleich<br>d) Ablasshandel                                                                                                                                                                                                                                                                                                                                                                                                                                | 0.755    | 1.17  |

| Subdimension | Facette    | Fragen                                                                                                                                                | Antworten                                                                                                                                                                                                                                                                                                                                | $\delta$ | Infit |
|--------------|------------|-------------------------------------------------------------------------------------------------------------------------------------------------------|------------------------------------------------------------------------------------------------------------------------------------------------------------------------------------------------------------------------------------------------------------------------------------------------------------------------------------------|----------|-------|
|              | Bildung    | 56. "Fracking" ist eine Methode...                                                                                                                    | <p><b>a) ...zur Gewinnung von Erdöl und Erdgas aus tiefen Gesteinsschichten.</b></p> <p>b) ...zur Lagerung von Atommüll.</p> <p>c) ...zur Überwachung des Surfverhaltens von Internetnutzern.</p> <p>d) ...zur Aufdeckung von Betrugsversuchen in Onlineshops.</p>                                                                       | -0.891   | 0.87  |
|              |            | 57. Die öffentlichen und privaten Bildungsausgaben sind seit 1995 im Vergleich zur wirtschaftlichen Entwicklung...                                    | <p><b>a) ...gesunken.</b></p> <p>b) ...angestiegen.</p> <p>c) ...sehr stark angestiegen.</p> <p>d) ...gleich hoch geblieben.</p>                                                                                                                                                                                                         | 1.335    | 1.08  |
|              |            | 58. Womit beschäftigen sich die PISA-Studien?                                                                                                         | <p><b>a) Alltags- und berufsrelevantes Wissen von 15-jährigen Schülerinnen und Schülern</b></p> <p>b) Medienverhalten von Jugendlichen zwischen 12 und 19 Jahren</p> <p>c) Politische Einstellungen von 15- bis 25-Jährigen</p> <p>d) Ernährungs- und Bewegungsgewohnheiten von Kindern und Jugendlichen bis 19 Jahren</p>               | -1.443   | 0.86  |
|              | Wirtschaft | 59. Was ist das Ziel der sogenannten Bologna-Reform?                                                                                                  | <p><b>a) Schaffung vergleichbarer Studienstrukturen an allen europäischen Universitäten</b></p> <p>b) Angleichung von Professorengehältern zwischen europäischen Universitäten</p> <p>c) Verringerung der Gefahren von Arbeitslosigkeit für Bachelor-Studierende</p> <p>d) Alle Antworten sind zutreffend.</p>                           | 0.199    | 0.95  |
|              |            | 60. Wie bezeichnet man eine wirtschaftliche Situation, in der es zu einer Steigerung des Preisniveaus und zur Senkung der Kaufkraft des Geldes kommt? | <p><b>a) Inflation</b></p> <p>b) Konjunktur</p> <p>c) Deflation</p> <p>d) Aufschwung</p>                                                                                                                                                                                                                                                 | -0.891   | 1.00  |
|              |            | 61. Was versteht man unter „Wirtschaftssanktionen“?                                                                                                   | <p><b>a) Einflussnahme auf das Verhalten anderer Staaten durch eine Einschränkung der Handelsbeziehungen</b></p> <p>b) Einschränkungen in den Staatsausgaben, um Schulden abzubauen</p> <p>c) Maßnahmen, um die Währungsstabilität in einer Region zu sichern</p> <p>d) Staatliche Beihilfe zur Erschließung neuer Wirtschaftsfelder</p> | -0.564   | 0.85  |

| Subdimension        | Facette    | Fragen                                                                                                                                         | Antworten                                                                                                                                                                                                                                                                                                                                                        | $\delta$ | Infit |
|---------------------|------------|------------------------------------------------------------------------------------------------------------------------------------------------|------------------------------------------------------------------------------------------------------------------------------------------------------------------------------------------------------------------------------------------------------------------------------------------------------------------------------------------------------------------|----------|-------|
|                     |            | 62. Worum handelt es sich bei CETA?                                                                                                            | <p>a) <b>CETA ist die Abkürzung für das Europäisch-Kanadische Freihandelsabkommen.</b></p> <p>b) CETA ist der Name eines neuen Medikamentes gegen Ebola.</p> <p>c) CETA ist die Abkürzung für das traditionelle Wirtschaftsabkommen zwischen der EU und den USA.</p> <p>d) CETA ist der Name eines neuen Medikamentes gegen Aids.</p>                            | 0.86     | 1.03  |
|                     | Gesundheit | 63. Was versteht man unter "Solidaritätsprinzip" (auch "Solidarprinzip" genannt)?                                                              | <p>a) <b>Die strukturelle Basis der gesetzlichen Krankenversicherung</b></p> <p>b) Ergänzungsabgabe zur Einkommensteuer, Kapitalertragsteuer und Körperschaftsteuer, die der Förderung des Ostens der Republik dient</p> <p>c) Das wichtigste Gründungsprinzip der EU</p> <p>d) Die Grundlage der Arbeit von nicht-staatlichen Organisationen in Deutschland</p> | 1.608    | 1.04  |
|                     |            | 64. Was versteht man unter „Gesundheitsfonds“?                                                                                                 | <p>a) <b>System zur Finanzierung der gesetzlichen Krankenversicherung</b></p> <p>b) Zuschuss der gesetzlichen Krankenkassen an ihre Mitglieder</p> <p>c) Beitragsgelder der gesetzlich Krankenversicherten</p> <p>d) Staatliche Subvention an die gesetzlichen Krankenkassen</p>                                                                                 | 0.515    | 1.04  |
|                     |            | 65. Weshalb ersetzt die elektronische Gesundheitskarte laut dem Bundesministerium für Gesundheit künftig die normale Krankenversichertenkarte? | <p>a) <b>Sie ermöglicht den Austausch von Krankendaten zwischen behandelnden Ärzten.</b></p> <p>b) Sie dient in Apotheken als Zahlungsmittel.</p> <p>c) Sie ist leichter auf Familienmitglieder übertragbar.</p> <p>d) Sie speichert automatisch den nächsten Arzttermin.</p>                                                                                    | -2.239   | 0.92  |
| 2. Aktuelle Akteure | Außen      | 66. Wie heißt der EU-Kommissionspräsident, der ab Oktober 2014 ins Amt tritt?                                                                  | <p>a) <b>Jean-Claude Juncker</b></p> <p>b) José Manuel Barroso</p> <p>c) Günther Öttinger</p> <p>d) Donald Tusk</p>                                                                                                                                                                                                                                              | -0.288   | 0.93  |
|                     |            | 67. Welcher Partei gehört der Außenminister Frank-Walter Steinmeier an?                                                                        | <p>a) <b>SPD</b></p> <p>b) Die Linke</p> <p>c) CDU</p> <p>d) Bündnis 90/Die Grünen</p>                                                                                                                                                                                                                                                                           | -0.666   | 0.89  |

| Subdimension | Facette             | Fragen                                                                                          | Antworten                                                                                                                                                                                                                                  | $\delta$ | Infit |
|--------------|---------------------|-------------------------------------------------------------------------------------------------|--------------------------------------------------------------------------------------------------------------------------------------------------------------------------------------------------------------------------------------------|----------|-------|
|              | Inneres             | 68. Wer ist seit 2012 Bundespräsident der Bundesrepublik Deutschland?                           | a) <b>Joachim Gauck</b><br>b) Horst Köhler<br>c) Theodor Heuss<br>d) Christian Wulff                                                                                                                                                       | -1.801   | 0.88  |
|              |                     | 69. Welche Position hat die abgebildete Person in der deutschen Bundesregierung inne?           | a) <b>Bundesminister des Inneren</b><br>b) Bundesminister für Ernährung und Landwirtschaft<br>c) Bundesminister für Vertriebene, Flüchtlinge und Kriegsgeschädigte<br>d) Bundesminister für wirtschaftliche Zusammenarbeit und Entwicklung | 0.283    | 0.95  |
|              | Finanzen            | 70. Wer ist derzeit Bundesfinanzminister/in?                                                    | a) <b>Wolfgang Schäuble</b><br>b) Peer Steinbrück<br>c) Sahra Wagenknecht<br>d) Sabine Leutheusser-Schnarrenberger                                                                                                                         | -1.018   | 0.92  |
|              |                     | 71. Wer ist amtierender Präsident der Europäischen Zentralbank (EZB)?                           | a) <b>Mario Draghi</b><br>b) Jean-Claude Trichet<br>c) Wim Duisenberg<br>d) Herman Van Rompuy                                                                                                                                              | 0.8      | 0.95  |
|              | Arbeit und Soziales | 72. Wer leitet derzeit das Bundesministerium für Arbeit und Soziales?                           | a) <b>Andrea Nahles</b><br>b) Franz Müntefering<br>c) Peer Steinbrück<br>d) Hannelore Kraft                                                                                                                                                | -0.236   | 0.89  |
|              |                     | 73. Welche der folgenden Parteien lehnt den allgemeinen flächendeckenden Mindestlohn strikt ab? | a) <b>FDP</b><br>b) SPD<br>c) Bündnis 90/Die Grünen<br>d) Die Linke                                                                                                                                                                        | 0.261    | 1.01  |
|              | Verteidigung        | 74. Wer leitet aktuell das Bundesministerium der Verteidigung?                                  | a) <b>Ursula von der Leyen</b><br>b) Ilse Aigner<br>c) Silvana Koch-Mehrin<br>d) Claudia Roth                                                                                                                                              | -2.118   | 0.88  |

| Subdimension | Facette | Fragen                                                                                                                             | Antworten                                                                                                                                                                                                                                         | $\delta$ | Infit |
|--------------|---------|------------------------------------------------------------------------------------------------------------------------------------|---------------------------------------------------------------------------------------------------------------------------------------------------------------------------------------------------------------------------------------------------|----------|-------|
|              |         | 75. Welche Partei lehnt die Anschaffung von Kampfdrohnen generell ab?                                                              | a) <b>Die Linke</b><br>b) SPD<br>c) CDU<br>d) Keine der genannten Parteien                                                                                                                                                                        | -0.071   | 0.98  |
|              | Familie | 76. Auf dem Foto ist die derzeitige Bundesministerin für Familie, Senioren, Frauen und Jugend abgebildet. Wie heißt sie?           | a) <b>Manuela Schwesig</b><br>b) Renate Schmidt<br>c) Nadine Schön<br>d) Kristina Schröder                                                                                                                                                        | 0.572    | 0.98  |
|              |         | 77. Wofür ist das sogenannte Familienministerium zuständig?                                                                        | a) Förderung einer familienfreundlichen Arbeitswelt<br>b) Gleichstellung für Frauen und Männer<br>c) Verabschiedung von Richtlinien für den Internationalen Jugendfreiwilligendienst<br>d) <b>Alle Antworten sind zutreffend.</b>                 | 0.697    | 1.19  |
|              | Umwelt  | 78. Auf dem Foto ist die derzeitige Bundesministerin für Umwelt, Naturschutz, Bau und Reaktorsicherheit abgebildet. Wie heißt sie? | a) <b>Barbara Hendricks</b><br>b) Katja Suding<br>c) Katja Kipping<br>d) Katrin Göring-Eckardt                                                                                                                                                    | 0.777    | 0.99  |
|              |         | 79. Womit beschäftigt sich die Institution IPCC?                                                                                   | a) <b>Klimawandel</b><br>b) Drogenmissbrauch<br>c) Migration<br>d) Keine der Antworten ist zutreffend.                                                                                                                                            | 0.859    | 1.17  |
|              | Bildung | 80. Wer ist auf dem vorliegenden Foto abgebildet?                                                                                  | a) <b>Johanna Wanka</b><br>b) Doris Schröder-Köpf<br>c) Annette Schavan<br>d) Herta Däubler-Gmelin                                                                                                                                                | 0.854    | 0.97  |
|              |         | 81. Was gehört <u>nicht</u> zu den Aufgaben der Bundeszentrale für politische Bildung (bpb)?                                       | a) <b>Erarbeitung der Lehrpläne für den Politikunterricht an Schulen</b><br>b) Stärkung der Bereitschaft zur politischen Mitarbeit<br>c) Festigung des demokratischen Bewusstseins<br>d) Vermittlung politischer Sachverhalte an die Gesellschaft | 0.849    | 1.10  |

| Subdimension | Facette    | Fragen                                                                                                 | Antworten                                                                                                                                                                                                                | $\delta$ | Infit |
|--------------|------------|--------------------------------------------------------------------------------------------------------|--------------------------------------------------------------------------------------------------------------------------------------------------------------------------------------------------------------------------|----------|-------|
|              | Wirtschaft | 82. Welche Position in der Bundesregierung hat die abgebildete Person?                                 | a) <b>Bundesminister für Wirtschaft und Energie</b><br>b) Bundesminister für Justiz und Verbraucherschutz<br>c) Bundesminister für Forschung und Technologie<br>d) Bundesminister für Verkehr und digitale Infrastruktur | -0.603   | 0.95  |
|              |            | 83. Welche der genannten Parteien fordert die Abschaffung des Euro als gemeinsame europäische Währung? | a) <b>AfD</b><br>b) Piratenpartei<br>c) CDU<br>d) Keine der genannten Parteien will den Euro abschaffen                                                                                                                  | -0.592   | 0.84  |
|              | Gesundheit | 84. Welcher Partei gehört der Bundesminister für Gesundheit Hermann Gröhe an?                          | A) <b>CDU</b><br>B) SPD<br>C) CSU<br>D) Die Linke                                                                                                                                                                        | 0.567    | 1.10  |
|              |            | 85. Womit beschäftigt sich die BZgA?                                                                   | a) <b>Gesundheitliche Aufklärung</b><br>b) Ganzheitliche Altenpflege<br>c) Globale Ausbeutung<br>d) Gesetzliche Anträge                                                                                                  | -0.236   | 1.01  |

*Anmerkungen.* <sup>1</sup> Die fettgedruckten Antworten sind die jeweils korrekten Antworten zum Zeitpunkt der Erhebung (November 2014). Die Reihenfolge der Antworten wurde in der Online-Befragung zufällig rotiert, Antwortoptionen wie „Alle Antworten sind zutreffend“ jedoch auf die letzte Position fixiert. <sup>2</sup>  $\delta$  (Delta) beschreibt die mit der Beantwortung einer bestimmten Frage *i* verbundenen Schwierigkeit (Itemschwierigkeit) <sup>3</sup>Weighted mean square Infit (WMNSQ Infit) beschreibt die Passung des Rasch-Modells. In den vorliegenden Tabellen sind die Infit-Werte für das zweidimensionale Rasch-Modell dargestellt. PISA = Programme for International Student Assessment; CETA = Comprehensive Economic and Trade Agreement; IPCC = Intergovernmental Panel on Climate Change; BZgA = Bundeszentrale für gesundheitliche Aufklärung.
