# Supplementary material for: Hohenheimer Inventar zum Politikwissen (HIP)
Source: Atypon-hosted journal article supplement (doi:10.1026/0012-1924/a000180), 2017-03-10
Supplement: 0012-1924_a000180_esm2.pdf [file 0012-1924_a000180_esm2.pdf]

ESM 2. Verteilung der Schätzungen des Politikwissens

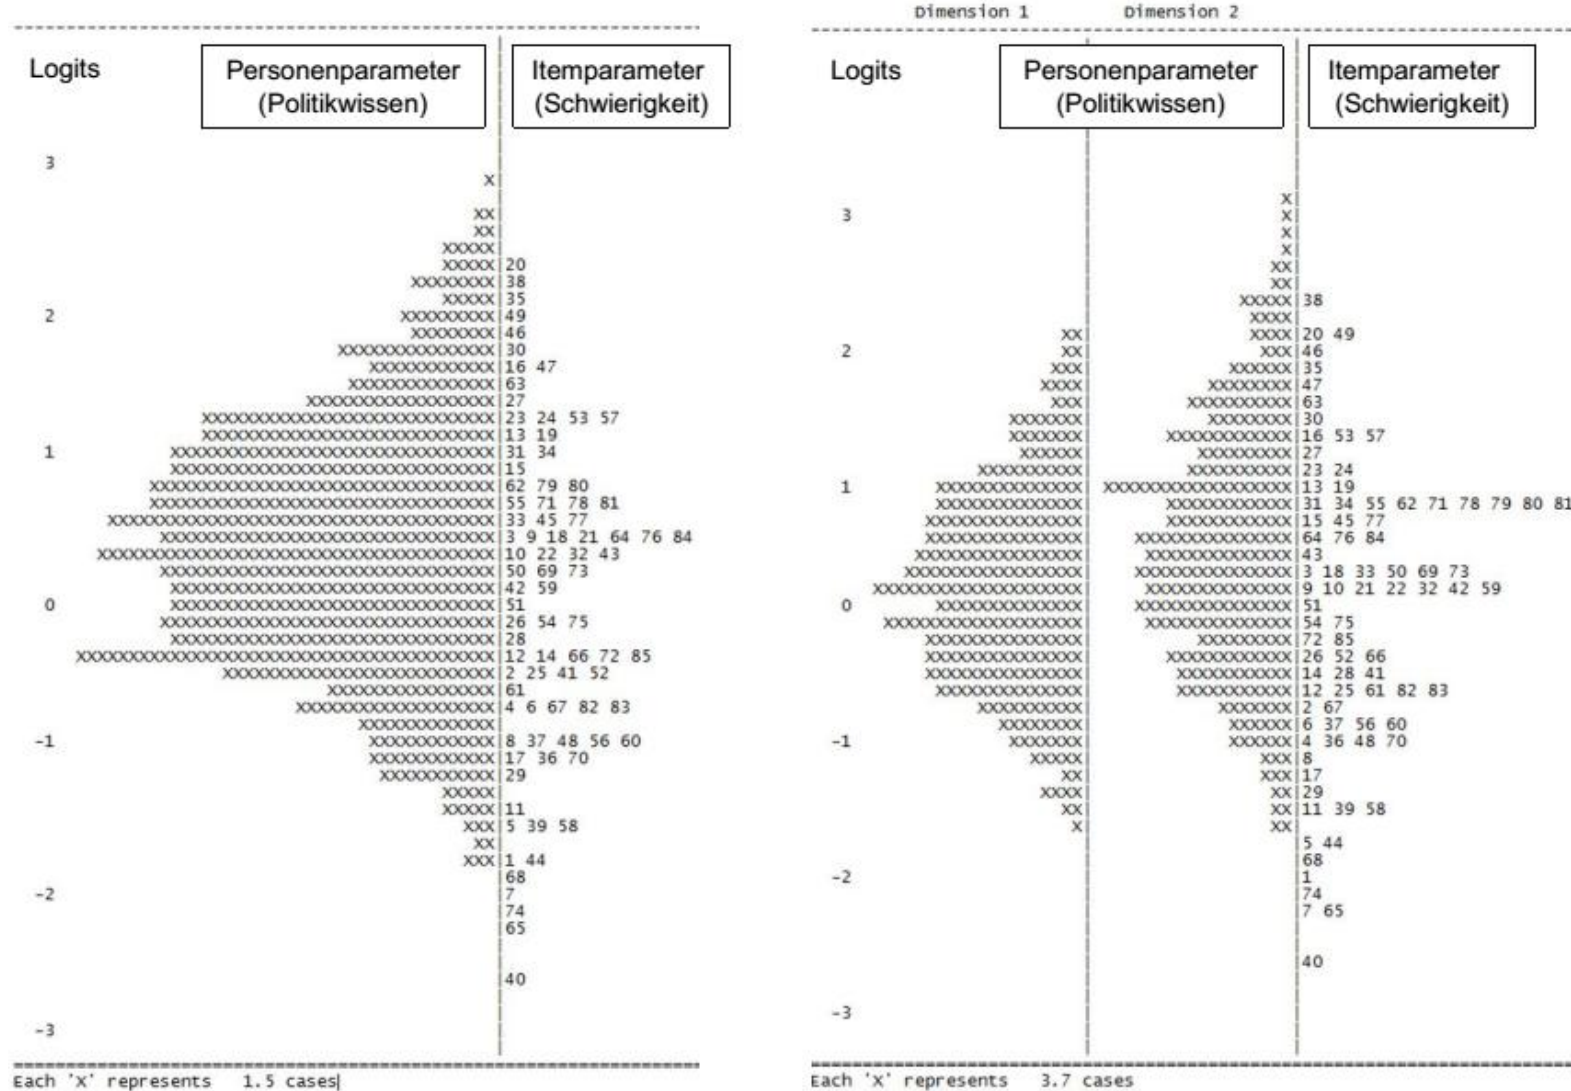

Anmerkungen. Verteilung der Schätzungen des Politikwissens (jedes x repräsentiert Personen mit dem jeweiligen Personenparameter; in der linken Graphik steht dieses x für 1,5 Personen, in der rechten Graphik für 3,7 Personen) und der Itemschwierigkeiten (jede Zahl repräsentiert die jeweilige Itemnummer) für das eindimensionale Model (links) und das zweidimensionale Modell (rechts), angegeben in der Einheit Logits.
